# Supplementary material for: Network motifs: structure does not determine function
Source: Springer Nature journal article supplement (doi:10.1186/1471-2164-7-108), 2006-05-05
Supplement: Additional file 1 [file 1471-2164-7-108-s1.pdf]

## Supplementary Material: Ordinary Differential Equations describing model

The following are the system of coupled ordinary differential equations which model the coherent bifan network, for which full cooperativity occurs. In this simple case, the kinetic parameters used for all four genes are identical. Note in particular the coupling terms between the DNA elements,  $D_Z$  and  $D_W$  and the regulatory proteins  $P_X$  and  $P_Y$ . The functions  $In_X$  and  $In_Y$  are modelled as offset Heaviside (step functions), eg:

$$In_X = 100\Theta(3600 - t)$$

$$\begin{aligned}
 \frac{d}{dt}D_X(t) &= -k_1D_X(t)In_X(t) + k_{-1}Q_X(t) \\
 \frac{d}{dt}Q_X(t) &= k_1D_X(t)In_X(t) - k_{-1}Q_X(t) - k_2Q_X(t)R_X(t) + k_{-2}Q_X^*(t) + k_3Q_X^*(t) \\
 \frac{d}{dt}Q_X^*(t) &= k_2Q_X(t)R_X(t) - k_{-2}Q_X^*(t) - k_3Q_X^*(t) \\
 \frac{d}{dt}R_X(t) &= -k_2Q_X(t)R_X(t) + k_{-2}Q_X^*(t) + k_3Q_X^*(t) \\
 \frac{d}{dt}M_X(t) &= k_3Q_X^*(t) - k_5M_X(t) \\
 \frac{d}{dt}P_X(t) &= k_4M_X(t) - k_6P_X(t) + (-k_1D_W(t)P_X(t) + k_{-1}T_W(t)) + (-k_1Q_W(t)P_X(t) + k_{-1}Q'_W(t)) \\
 &\quad + (-k_1D_Z(t)P_X(t) + k_{-1}T_Z(t)) + (-k_1Q_Z(t)P_X(t) + k_{-1}Q'_Z(t))
 \end{aligned} \tag{1}$$

$$\begin{aligned}
 \frac{d}{dt}D_Y(t) &= -k_1D_Y(t)In_Y(t) + k_{-1}Q_Y(t) \\
 \frac{d}{dt}Q_Y(t) &= k_1D_Y(t)In_Y(t) - k_{-1}Q_Y(t) - k_2Q_Y(t)R_Y(t) + k_{-2}Q_Y^*(t) + k_3Q_Y^*(t) \\
 \frac{d}{dt}Q_Y^*(t) &= k_2Q_Y(t)R_Y(t) - k_{-2}Q_Y^*(t) - k_3Q_Y^*(t) \\
 \frac{d}{dt}R_Y(t) &= -k_2Q_Y(t)R_Y(t) + k_{-2}Q_Y^*(t) + k_3Q_Y^*(t) \\
 \frac{d}{dt}M_Y(t) &= k_3Q_Y^*(t) - k_5M_Y(t) \\
 \frac{d}{dt}P_Y(t) &= k_4M_Y(t) - k_6P_Y(t) + (-k_1D_W(t)P_Y(t) + k_{-1}Q_W(t)) + (-k_1T_W(t)P_Y(t) + k_{-1}Q'_W(t)) + \\
 &\quad (-k_1D_Z(t)P_Y(t) + k_{-1}Q_Z(t)) + (-k_1T_Z(t)P_Y(t) + k_{-1}Q'_Z(t))
 \end{aligned} \tag{2}$$

$$\begin{aligned}
\frac{d}{dt}D_Z(t) &= (-k_1D_Z(t)P_Y(t) + k_{-1}Q_Z(t)) + (-k_1D_Z(t)P_X(t) + k_{-1}T_Z(t)) \\
\frac{d}{dt}Q_Z(t) &= (k_1D_Z(t)P_Y(t) - k_{-1}Q_Z(t)) + (-k_1Q_Z(t)P_X(t) + k_{-1}Q'_Z(t)) \\
\frac{d}{dt}T_Z(t) &= (k_1D_Z(t)P_X(t) - k_{-1}T_Z(t)) + (-k_1T_Z(t)P_Y(t) + k_{-1}Q'_Z(t)) \quad (3) \\
\frac{d}{dt}Q'_Z(t) &= (k_1Q_Z(t)P_X(t) - k_{-1}Q'_Z(t)) + (k_1T_Z(t)P_Y(t) - k_{-1}Q'_Z(t)) \\
&\quad + (-k_2Q'_Z(t)R_Z(t) + k_{-2}Q_Z^*(t)) + (k_9Q_Z^*(t)) \\
\frac{d}{dt}R_Z(t) &= (-k_2Q'_Z(t)R_Z(t) + k_{-2}Q_Z^*(t)) + (k_9Q_Z^*(t)) \\
\frac{d}{dt}Q_Z^*(t) &= (k_2Q'_Z(t)R_Z(t) - k_{-2}Q_Z^*(t)) + (-k_9Q_Z^*(t)) \\
\frac{d}{dt}M_Z(t) &= k_9Q_Z^*(t) - k_5M_Z(t) \\
\frac{d}{dt}P_Z(t) &= k_4M_Z(t) - k_6P_Z(t)
\end{aligned}$$

$$\begin{aligned}
\frac{d}{dt}D_W(t) &= (-k_1D_W(t)P_Y(t) + k_{-1}Q_W(t)) + (-k_1D_W(t)P_X(t) + k_{-1}T_W(t)) \\
\frac{d}{dt}Q_W(t) &= (k_1D_W(t)P_Y(t) - k_{-1}Q_W(t)) + (-k_1Q_W(t)P_X(t) + k_{-1}Q'_W(t)) \\
\frac{d}{dt}T_W(t) &= (k_1D_W(t)P_X(t) - k_{-1}T_W(t)) + (-k_1T_W(t)P_Y(t) + k_{-1}Q'_W(t)) \quad (4) \\
\frac{d}{dt}Q'_W(t) &= (k_1Q_W(t)P_X(t) - k_{-1}Q'_W(t)) + (k_1T_W(t)P_Y(t) - k_{-1}Q'_W(t)) \\
&\quad + (-k_2Q'_W(t)R_W(t) + k_{-2}Q_W^*(t)) + (k_9Q_W^*(t)) \\
\frac{d}{dt}R_W(t) &= (-k_2Q'_W(t)R_W(t) + k_{-2}Q_W^*(t)) + (k_9Q_W^*(t)) \\
\frac{d}{dt}Q_W^*(t) &= (k_2Q'_W(t)R_W(t) - k_{-2}Q_W^*(t)) + (-k_9Q_W^*(t)) \\
\frac{d}{dt}M_W(t) &= k_9Q_W^*(t) - k_5M_W(t) \\
\frac{d}{dt}P_W(t) &= k_4M_W(t) - k_6P_W(t)
\end{aligned}$$
